# Supplementary material for: Combustion synthesis of Cr2O3octahedra with a chromium-containing metal–organic framework as a sacrificial template
Source: Royal Society of Chemistry journal article supplement (doi:10.1039/c4ce02529f), 2015-01-01
Supplement: c4ce02529f1.pdf [file c4ce02529f1.pdf]

## Supporting Information

### Combustion synthesis of $\text{Cr}_2\text{O}_3$ octahedrons with a chromium-containing metal-organic framework as a sacrificial template

Albert A. Voskanyan, Chi-Ying Vanessa Li, Kwong-Yu Chan\*, and Liang Gao

Department of Chemistry, The University of Hong Kong, Pokfulam Road, Hong Kong.

\*Email: hrsccy@hku.hk

#### Contents

S1 - Experimental details: MIL-101 synthesis, characterization techniques,  $\text{Cr}(\text{NO}_3)_3$ -glycine confinement, combustion and  $\text{Cr}_2\text{O}_3$  characterization.

S2 - The decomposition reaction mechanism of  $\text{Cr}(\text{NO}_3)_3 \cdot 9\text{H}_2\text{O}$

Figure (S1) XRD pattern of MIL-101

Figure (S2) TEM images of MIL-101

Figure (S3) SEM image of MIL-101

Figure (S4)  $\text{N}_2$  sorption curve of MIL-101 with pore size distribution

Figure (S5) Temperature time profiles

Figure (S6) XRD patterns of MIL-101,  $\text{Cr}(\text{NO}_3)_3$  and confined  $\text{Cr}(\text{NO}_3)_3/\text{MIL-101}$

Figure (S7) XRD pattern of  $\text{Cr}_2\text{O}_3$  prepared by CS without and with MOF template

Figure (S8)  $\text{N}_2$  sorption curve of  $\text{Cr}_2\text{O}_3$  with pore size distribution

Figure (S9) EDX of  $\text{Cr}_2\text{O}_3$  octahedrons

Figure (S10) SEM images of  $\text{Cr}_2\text{O}_3$  synthesized without MIL-101 template

Figure (S11) SEM images of  $\text{Cr}_2\text{O}_3$  synthesized by pyrolysis of MIL-101 at 400 °C in air.

Figure (S12) TEM images of  $\text{Cr}_2\text{O}_3$  synthesized by pyrolysis of MIL-101 at 600 °C in air

Figure (S13) XRD pattern and BJH pore size distribution of  $\text{Cr}_2\text{O}_3$  by pyrolysis of MIL-101 pyrolysis at 600 °C in air

References

## **S1 - Experimental details: MIL-101 synthesis, Cr(NO<sub>3</sub>)<sub>3</sub>-glycine confinement, combustion and Cr<sub>2</sub>O<sub>3</sub> characterization.**

MIL-101 was prepared according to a previously reported method.<sup>1</sup> Briefly, 18g Cr(NO<sub>3</sub>)<sub>3</sub>·9H<sub>2</sub>O, 7.38 g 1,4-benzene dicarboxylic acid and 1 ml HF were dissolved in 216 ml H<sub>2</sub>O, and then the mixture was heated in a hydrothermal bomb at 220°C for 8h. The as-prepared MIL-101 was washed several times by hot ethanol and was then immersed in 30 mM NH<sub>4</sub>F solution overnight at 60 °C to remove terephthalic acid, which is generally present within the pores of MIL-101.<sup>2</sup>

To confine the Cr(NO<sub>3</sub>)<sub>3</sub>-glycine mixture, 2 g of outgassed MIL-101 was suspended in 5 ml H<sub>2</sub>O containing 2 g of dissolved Cr(NO<sub>3</sub>)<sub>3</sub>·9H<sub>2</sub>O and 0.62 g of glycine overnight. In all experiments, the Cr(NO<sub>3</sub>)<sub>3</sub>/glycine (1:1.67 molar ratio) stoichiometric ratio was used. Then, the mixture was heated at 80 °C under static vacuum for 4 hours to complete impregnation. The obtained dark green gel was transferred onto a hot plate and was heated at 150 °C in air to initiate combustion reaction. After the reaction, the final powder was collected for further characterization.

For comparison, a pyrolysis of MIL-101 was conducted at 600 and 400 °C with a heating rate of 2 °C min<sup>-1</sup> for 6 and 1 h in air, respectively.

### **Characterization**

K-type thermocouples with 0.1 mm diameter were used to monitor the temperature-time history of the combustion process. The outlet signals of the thermocouples were passed to a computer using a multichannel data acquisition line (Data Translation Inc.) with a monitoring frequency of 1 kHz using Quick

DAC software. At least three measurements were performed to obtain the combustion data. Thermal gravimetric analysis (TGA) was performed under 20ml/min gas flow with a heating rate of 10 °C/min. Differential scanning calorimetry (DSC) was performed under 20ml/min air flow at a heating rate of 10 °C/min. The compositions of as-synthesized powders were determined using powder X-ray diffraction (XRD) with  $\text{CuK}\alpha$  radiation at 40 kV and 40 mA (D8 Advance, Bruker). The powder microstructures were imaged using scanning electron microscopy (SEM) (Hitachi S-4800 with an accelerating voltage of 7kV) equipped with an energy dispersive X-ray spectrometer (EDS). Transmission electron microscopy (TEM) and selected area diffraction (SAED) studies were conducted to characterize the structure and composition of the reaction products (Phillips THECNAI 20 with an accelerating voltage of 200kV). A Micromeritics ASAP 2020 analyzer was used to carry out the Brunauer-Emmet-Teller (BET) surface areas and Barrett-Joyner-Halenda (BJH) pore size distributions of oxides using nitrogen as the adsorbent gas at 77K. Oxide powders were degassed at 473K overnight under the vacuum before the analysis.

## S2 – Decomposition reaction mechanism of chromium nitrate

The steps in the decomposition reaction mechanism of  $\text{Cr}(\text{NO}_3)_3 \cdot 9\text{H}_2\text{O}$  have been proposed in the literature as follows.<sup>3</sup>

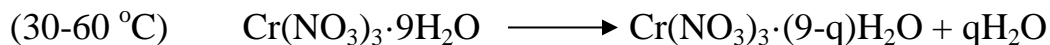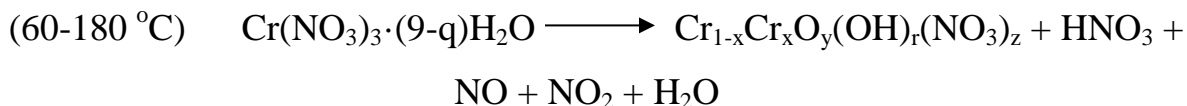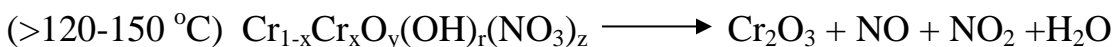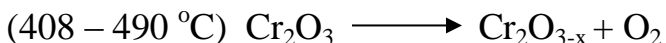

After initial loss of water of crystallization at low temperature, further water release from  $\text{Cr}(\text{NO}_3)_3 \cdot 9\text{H}_2\text{O}$  salt is accompanied with nitrate decomposition at different steps at higher temperature. At temperature above  $400^\circ\text{C}$ , further removal of oxygen from  $\text{Cr}_2\text{O}_3$  lattice can take place.

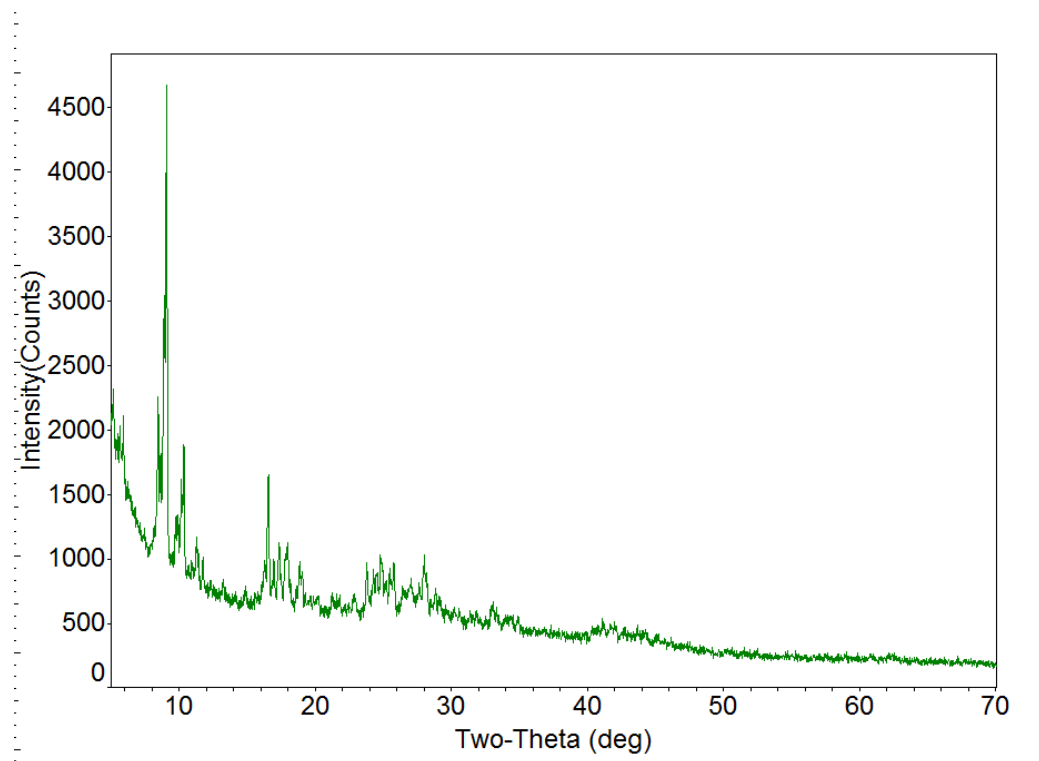

Figure S1. XRD pattern of MIL-101.

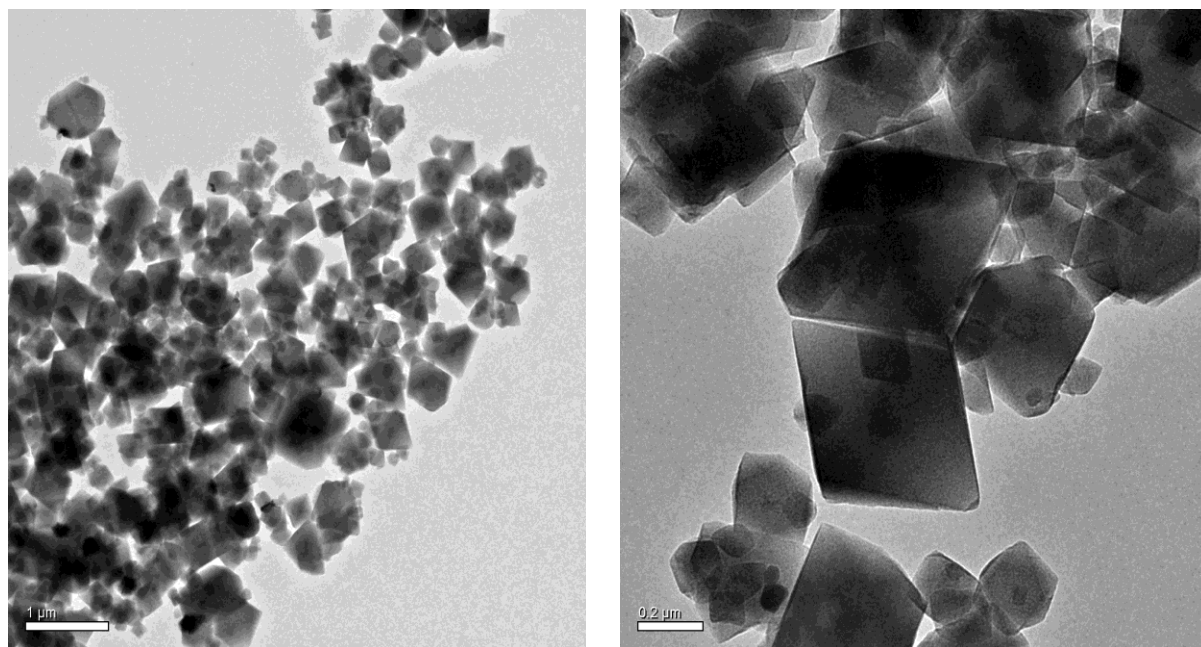

Figure S2. TEM images of MIL-101.

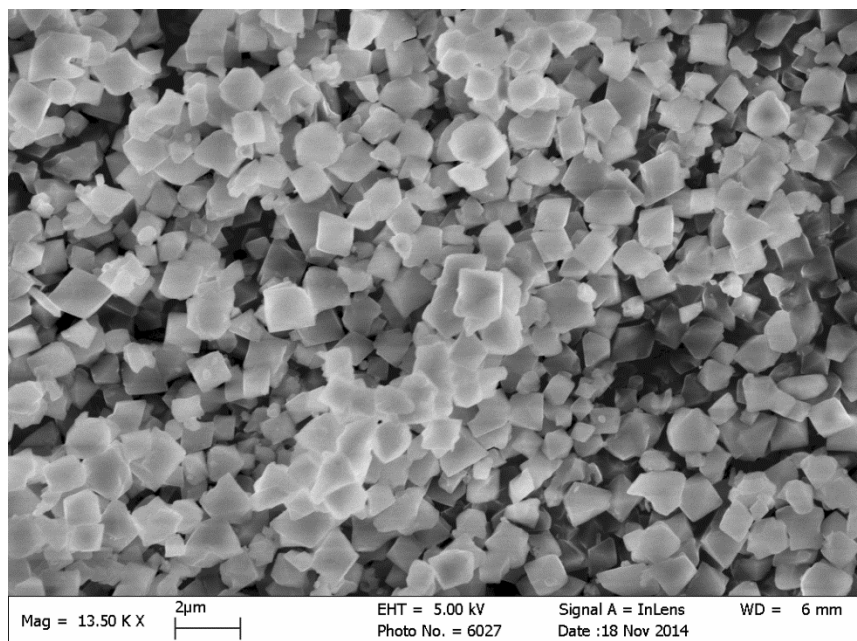

Figure S3. SEM image of MIL-101.

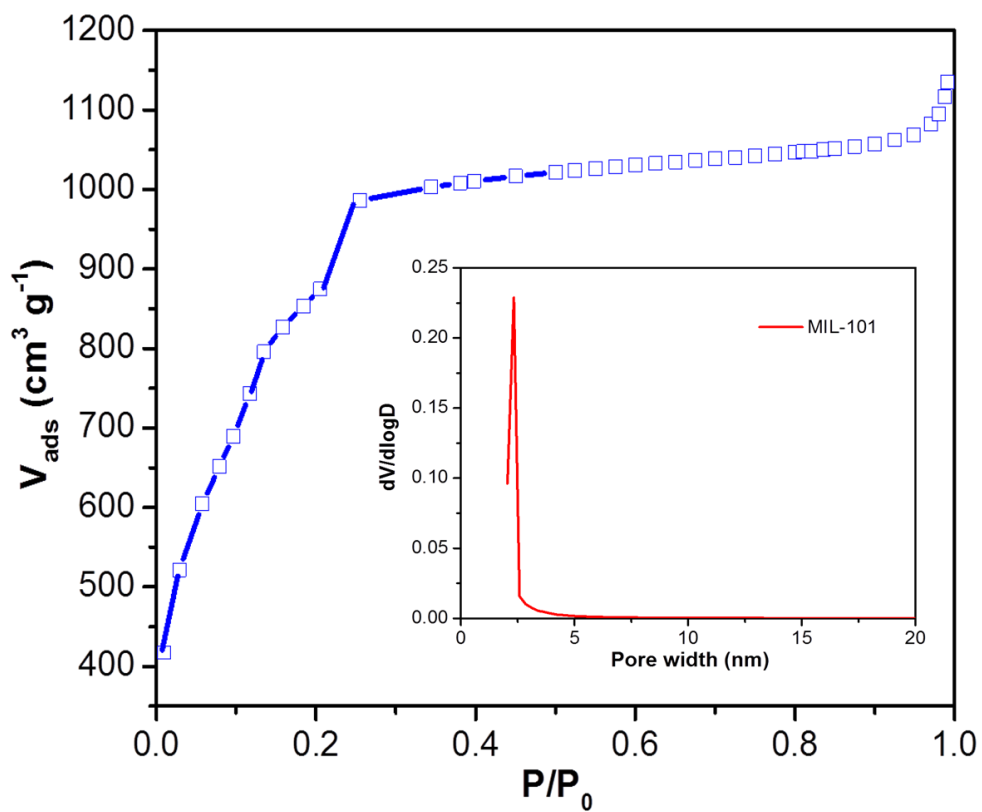

Figure S4.  $\text{N}_2$  sorption isotherm at 77K for MIL-101(inset: pore size distribution).

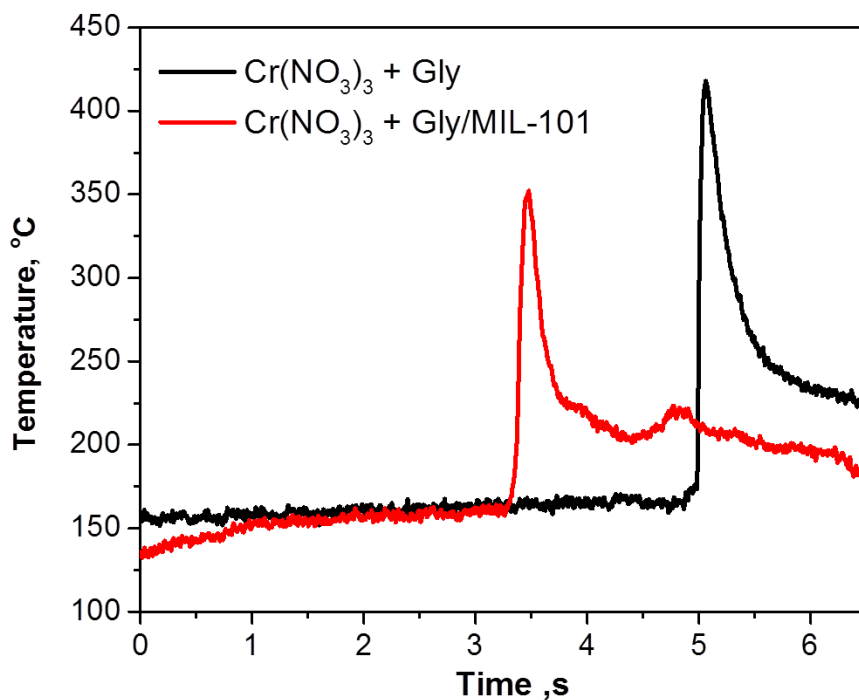

Figure S5. Temperature-time profiles for  $\text{Cr}(\text{NO}_3)_3$ -glycine and  $\text{Cr}(\text{NO}_3)_3$ -glycine/MIL-101.

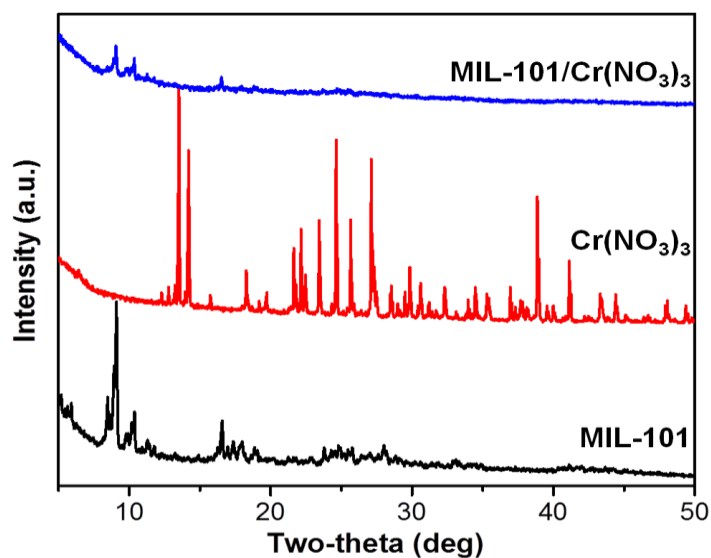

Figure S6. XRD patterns of MIL-101,  $\text{Cr}(\text{NO}_3)_3$  and MIL-101 impregnated with  $\text{Cr}(\text{NO}_3)_3$  and dried in air, MIL-101/ $\text{Cr}(\text{NO}_3)_3$ .

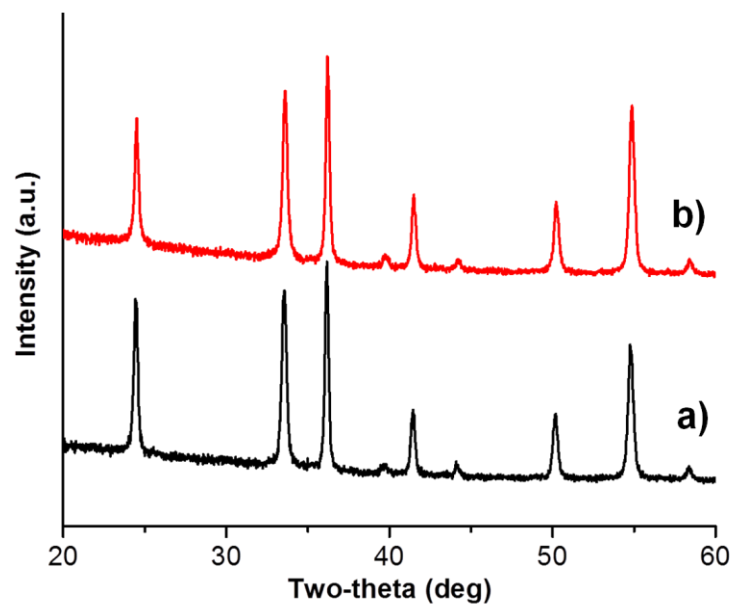

Figure S7. XRD pattern of prepared Cr<sub>2</sub>O<sub>3</sub> by combustion synthesis a) without MOF template b) with MOF template.

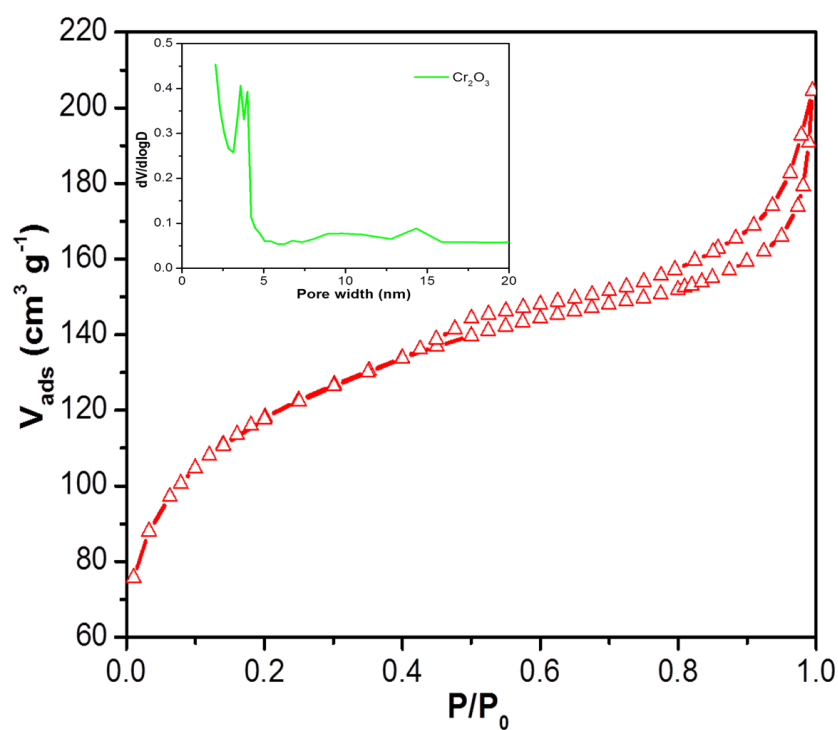

Figure S8. N<sub>2</sub> sorption isotherm at 77K for Cr<sub>2</sub>O<sub>3</sub> octahedrons (inset: pore size distribution).



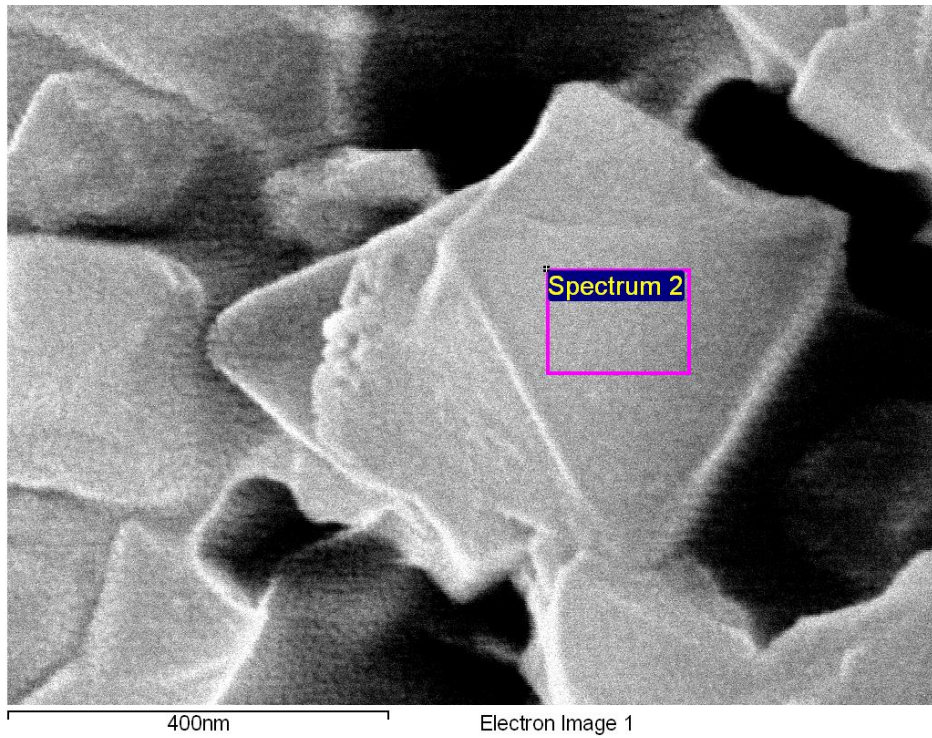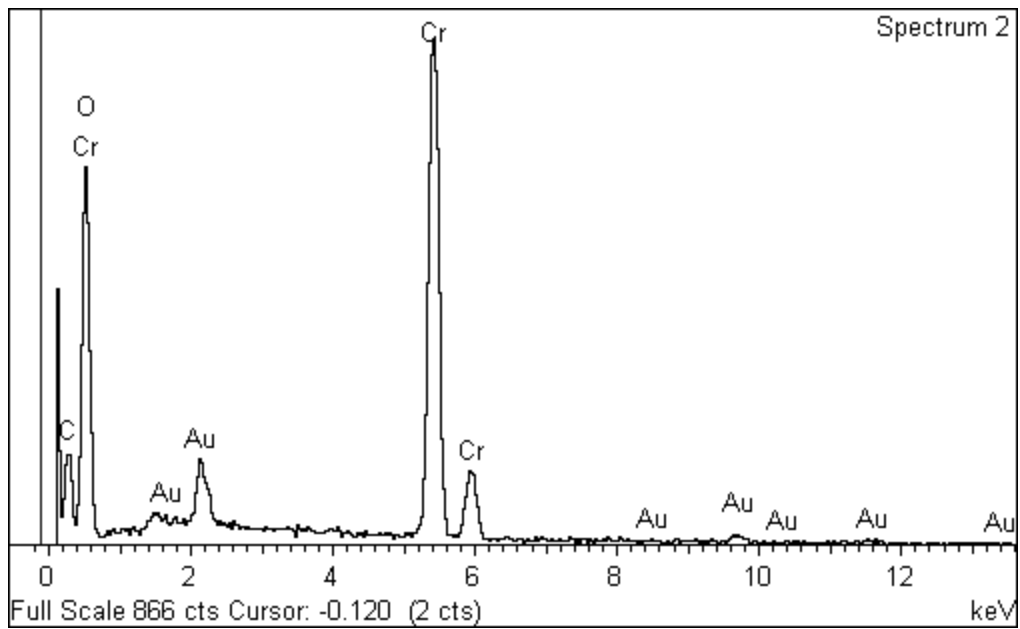

Figure S9. SEM images and EDX of the gold coated Cr<sub>2</sub>O<sub>3</sub> octahedrons.

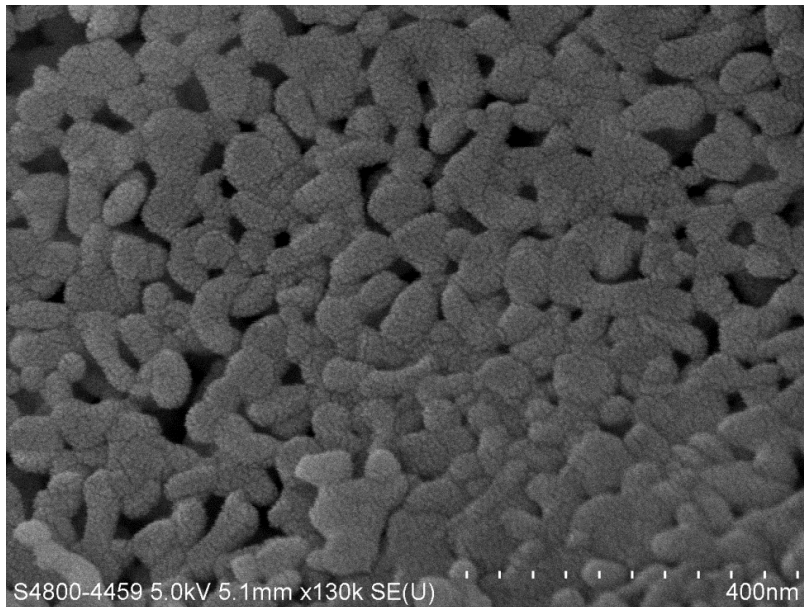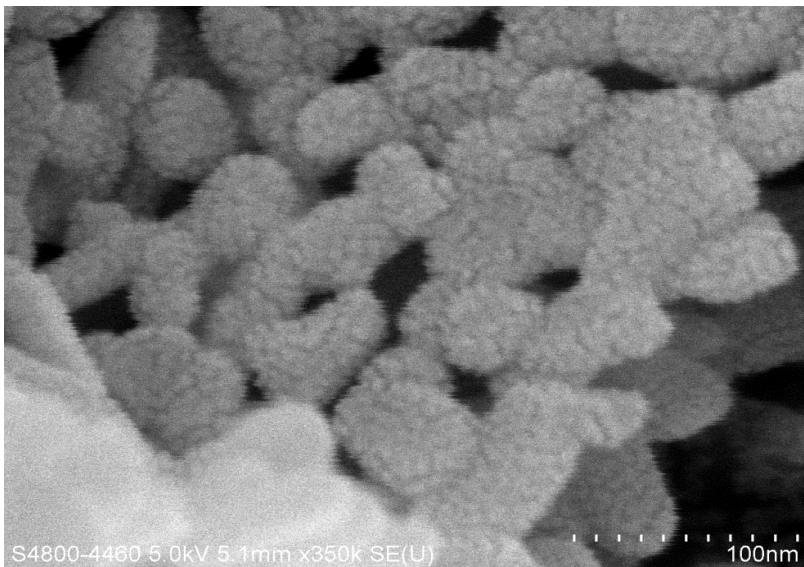

Figure S10. SEM images of  $\text{Cr}_2\text{O}_3$  synthesized without MIL-101 template.

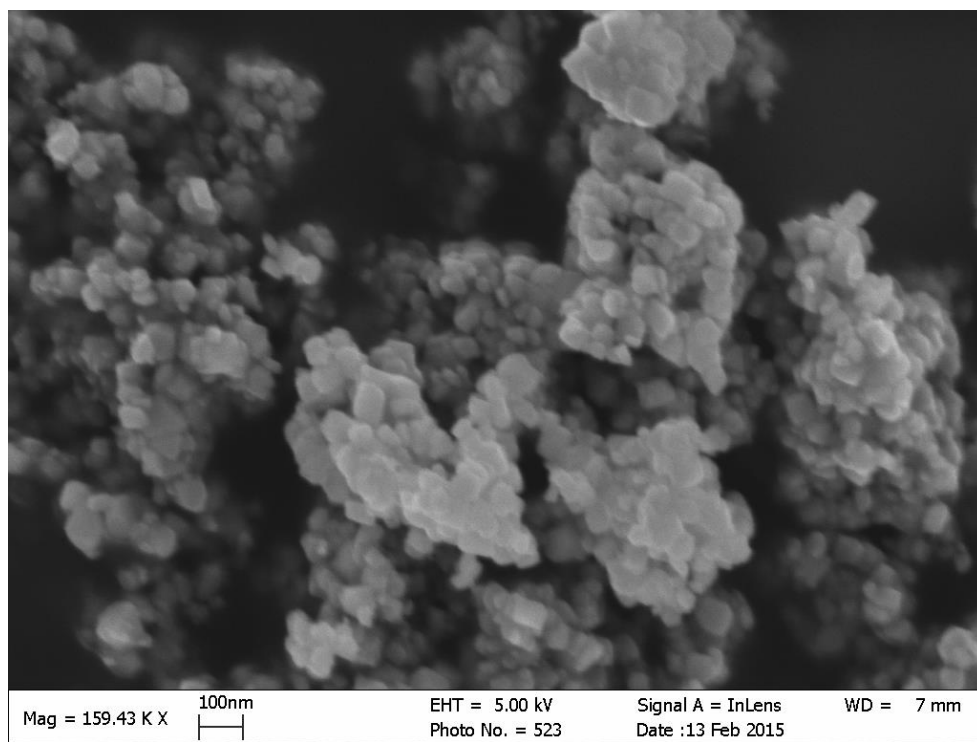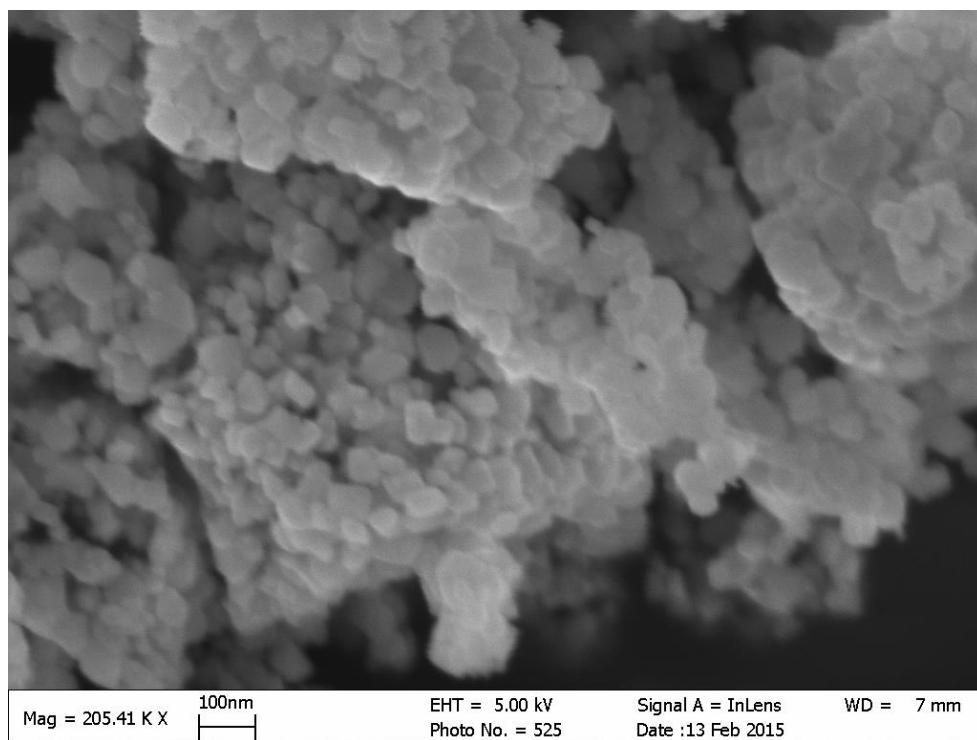

Figure S11. SEM image of  $\text{Cr}_2\text{O}_3$  synthesized by pyrolysis of MIL-101 at 400 °C in air.

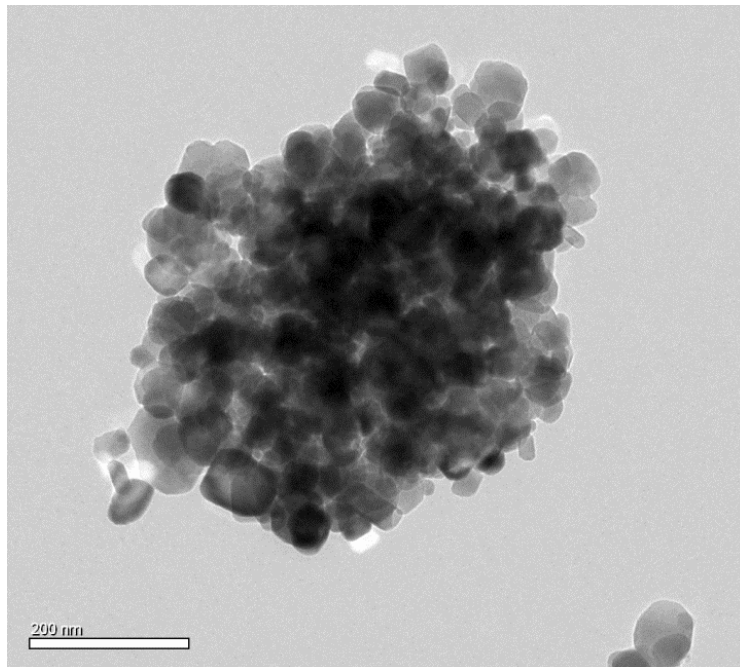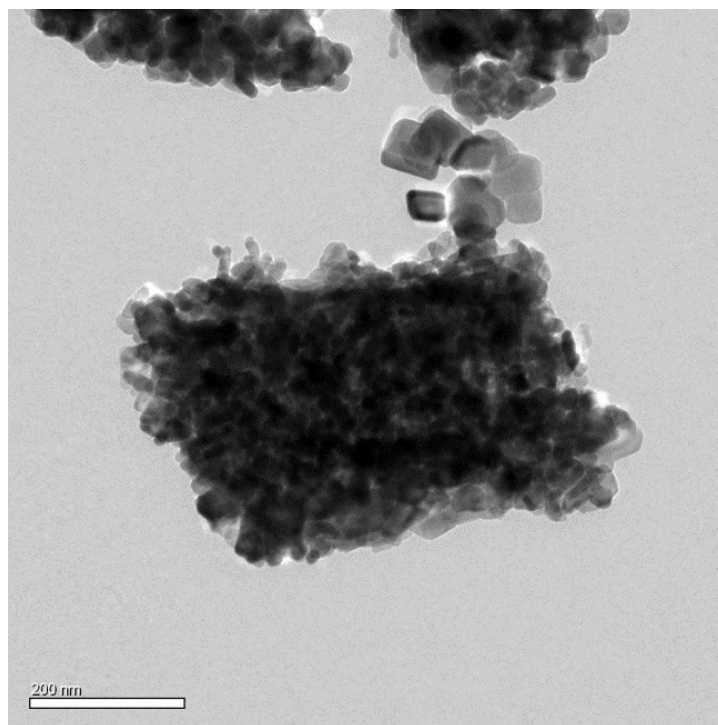

Figure S12. TEM images of  $\text{Cr}_2\text{O}_3$  synthesized by pyrolysis of MIL-101 at  $600^\circ\text{C}$  in air.

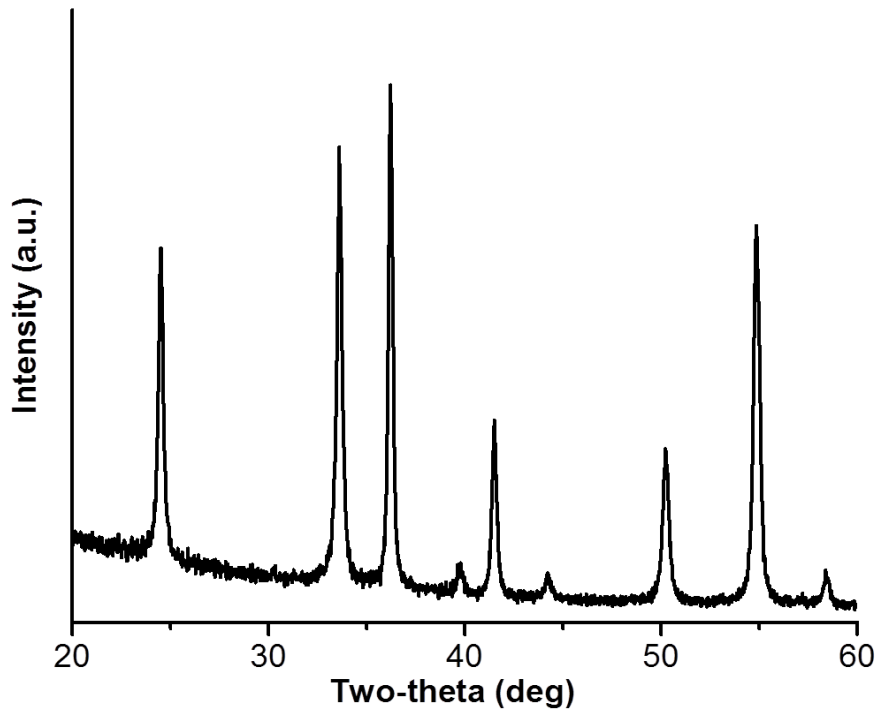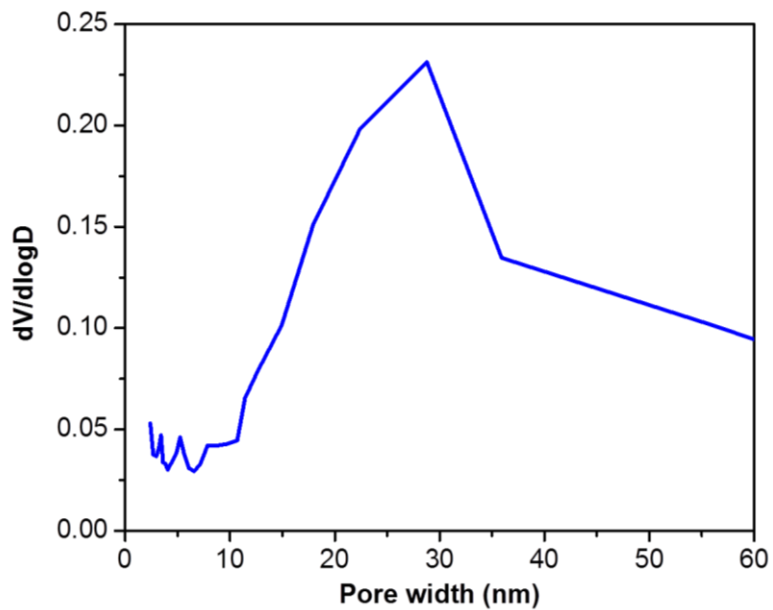

Figure S13. XRD pattern and BJH pore size distribution of  $\text{Cr}_2\text{O}_3$  synthesized by pyrolysis of MIL-101 at  $600^\circ\text{C}$  in air.

## References

1. G. Ferey, C. Mellot-Draznieks, C. Serre, F. Millange, J. Dutuor, S. Surble, I. Margiolaki, *Science* **2005**, 309, 2040-2042.
2. D.-Y. Hong, Y.K. Hwang, C. Serre, G. Ferey, J.-S. Chang, *Adv. Funct. Mater.* **2009**, 19, 1537-1552.
3. L. Li, Z.F. Yan, G.Q. Lu, Z.H. Zhu, *J. Phys. Chem. B* **2006**, 110, 178-183.
